# Supplementary material
Source: MDPI journal article supplement (https://www.mdpi.com/2073-4441/15/4/830)
Supplement: s1 [file s1]

# Supplementary Materials

## Content:

### Table: 7

Table S1. Table S1. PCR specific primer sequence.

Table S2. Table S2. Physiological and biochemical characteristics of strain P1.

Table S3. Genomic characteristics of *Pseudomonas* sp. P1.

Table S4. Description of genes obtained from genome of P1 relevant to BPA degradation.

Table S5. Comparison of BPA degradation rates by various microorganisms

Table S6. Information about functional genes resistant to BPA toxicity.

Table S7. LC-MS data of BPA degradation intermediates

### Figure: 4

Figure S1. Scanning electron microscope (A) and morphological observation (B) of strain P1.

Figure S2. The complete TCA cycle (A) and Benzoate degradation (B) were present in the genome of strain P1. The data are based on RAST analysis. Enzyme committee numbers were obtained from the KEGG database.

Figure S3. (A) PCR results of BPA degradation-related genes. (B) RT-PCR agarose gel electrophoresis of BPA degradation-related genes under different conditions.

Figure S4. Degradation of BPA by strain P1 (A) different temperature, (B) different pH, (C) different inoculum size, (D) different initial concentration.

# 1. Supplementary Tables

Table S1. PCR specific primer sequence

| Gene Name | Primer name   | Sequence (5' to 3')       | Primer locus |
|-----------|---------------|---------------------------|--------------|
| GE002964  | RT1324-1-P1F  | TACAACGCCGTGTCGGAAAT      | 40           |
|           | RT1324-1-P1R  | GATCACTGGCAACCTGGATACG    | 1269         |
| GE002994  | RT1324-2-P1F  | ACACAACGAGCTGACTAAGGCAT   | 15           |
|           | RT1324-2-P1R  | TGGGGTCAAGGCGGATGT        | 1207         |
| GE001899  | RT1324-3-P1F  | ATGCCGCTGGTGACATTCCT      | 1            |
|           | RT1324-3-P1R  | CGTGGTTGAGCGAATACTTGG     | 322          |
| GE002971  | RT1324-4-P1F  | ATGCCCACACTGACCTTTATCG    | 1            |
|           | RT1324-4-P1R  | GCCTTCCATGTCTTCACTGATAATC | 288          |
| GE002989  | RT1324-6-P1F  | CACCCCATCCGGGCTACTAC      | 26           |
|           | RT1324-6-P1R  | ACCTACCTTGCCTATCTTGGACG   | 1059         |
| GE003785  | RT1324-7-P1F  | CTGCAGGTTTCCGCCCTTAC      | 31           |
|           | RT1324-7-P1R  | CACGGTAATTCTGCCGCTAAC     | 1005         |
| GE000741  | RT1324-9-P1F  | AACCTGGCGATCATCGGTG       | 13           |
|           | RT1324-9-P1R  | GGTGGCAGCAGGTCGAGC        | 1130         |
| GE003776  | RT1324-11-P1F | ACCGTCGCTACGCTGATGC       | 52           |
|           | RT1324-11-P3R | CGATTTACGGTCACGGTC        | 3351         |
| GE000932  | RT1324-12-P1F | GCCGGTCTGGGCTGTGAC        | 12           |
|           | RT1324-12-P2R | GGAACAGTAGGTGGCAGTGGTAG   | 1774         |
| GE001625  | RT1324-13-P1F | CGCCTGACTCAGTCGCTGCT      | 8            |
|           | RT1324-13-P1R | CACACAAGGGAAGCAAAACG      | 725          |

Table S2. Physiological and biochemical characteristics of strain P1

| Test item                                     | Positive(+) /<br>negative(-) | Test item          | Positive(+) /<br>negative(-) |
|-----------------------------------------------|------------------------------|--------------------|------------------------------|
| O-Nitrobenzene-galactoside                    | -                            | Glucose            | -                            |
| Arginine                                      | +                            | Mannitol           | -                            |
| Lysine                                        | -                            | Inositol           | -                            |
| Ornisanine                                    | -                            | Sorbitol           | -                            |
| Sodium citrate                                | +                            | Rhamnose           | -                            |
| Na <sub>2</sub> S <sub>2</sub> O <sub>3</sub> | -                            | Sucrose            | -                            |
| Urea                                          | -                            | Dense disaccharide | +                            |
| Tryptophan                                    | -                            | Amygdalin          | -                            |
| Pyruvate                                      | -                            | Arabinose          | -                            |
| Kohn gelatin                                  | -                            | Cytochrome oxidase | +                            |

Table S3. Genomic characteristics of strain P1

| features         | genome    | Database  | Number |
|------------------|-----------|-----------|--------|
| Genome size (bp) | 6,172,654 | eggNOG    | 4,767  |
| GC content (%)   | 62.43%    | GO        | 4,310  |
| Genes (coding)   | 87.98%    | Kegg      | 2,990  |
| Genes            | 5636      | Nr        | 5,602  |
| Gene Island      | 18        | Pfam      | 4,866  |
| tRNA             | 74        | SwissProt | 3,451  |
| rRNA             | 22        | TrEMBL    | 3,451  |
| 5S rRNA          | 8         | CAZy      | 120    |
| 16S rRNA         | 7         | TCDB      | 1,610  |
| 23S rRNA         | 7         |           |        |

Table S4. Description of genes obtained from genome of P1 relevant to BPA degradation

| Gene ID  | KO     | Gene Description                                | E-value   |
|----------|--------|-------------------------------------------------|-----------|
| GE000135 | K00528 | ferredoxin/flavodoxin---NADP+ reductase         | 2.20e-145 |
| GE000144 | K00448 | protocatechuate 3,4-dioxygenase, alpha subunit  | 1.40e-115 |
| GE000145 | K00449 | protocatechuate 3,4-dioxygenase, beta subunit   | 8.70e-144 |
| GE000372 | K11959 | urea transport system substrate-binding protein | 1.20e-244 |
| GE000739 | K18800 | 2-polyprenylphenol 6-hydroxylase                | 4.50e-233 |
| GE000741 | K03185 | 2-octaprenyl-6-methoxyphenol hydroxylase        | 1.10e-231 |
| GE001421 | K06134 | 3-demethoxyubiquinol 3-hydroxylase              | 3.70e-117 |
| GE001625 | K05810 | polyphenol oxidase                              | 5.50e-141 |
| GE001899 | K04755 | ferredoxin, 2Fe-2S                              | 2.60e-61  |
| GE001914 | K07336 | PKHD-type hydroxylase                           | 3.00e-130 |
| GE002190 | K05524 | ferredoxin                                      | 1.00e-59  |
| GE002202 | K00528 | ferredoxin/flavodoxin---NADP+ reductase         | 6.10e-151 |
| GE002435 | K15777 | 4,5-DOPA dioxygenase extradiol                  | 3.10e-147 |
| GE002948 | K04090 | indolepyruvate ferredoxin oxidoreductase        | 0.00e+00  |
| GE002971 | K04755 | ferredoxin, 2Fe-2S                              | 8.00e-57  |
| GE002973 | K05337 | ferredoxin                                      | 5.50e-39  |
| GE002992 | K00632 | acetyl-CoA acyltransferase                      | 1.30e-213 |
| GE003196 | K00114 | alcohol dehydrogenase (cytochrome c)            | 0.00e+00  |
| GE003201 | K00114 | alcohol dehydrogenase (cytochrome c)            | 0.00e+00  |
| GE003202 | K00138 | aldehyde dehydrogenase                          | 1.10e-294 |
| GE003214 | K00005 | glycerol dehydrogenase                          | 3.00e-204 |
| GE003216 | K00014 | shikimate dehydrogenase                         | 1.70e-148 |
| GE003217 | K00005 | glycerol dehydrogenase                          | 4.10e-223 |
| GE003363 | K00019 | 3-hydroxybutyrate dehydrogenase                 | 8.40e-137 |
| GE003765 | K15746 | beta-carotene 3-hydroxylase                     | 4.90e-87  |
| GE003794 | K03381 | catechol 1,2-dioxygenase                        | 7.60e-177 |
| GE003798 | K05550 | benzoate/toluate 1,2-dioxygenase subunit beta   | 3.40e-91  |
| GE003799 | K05549 | benzoate/toluate 1,2-dioxygenase subunit alpha  | 7.60e-274 |

|          |        |                                                                                        |           |
|----------|--------|----------------------------------------------------------------------------------------|-----------|
| GE003811 | K08324 | succinate-semialdehyde dehydrogenase                                                   | 3.40e-261 |
| GE004035 | K15737 | glutarate dioxygenase                                                                  | 1.10e-189 |
| GE004064 | K00481 | p-hydroxybenzoate 3-monooxygenase                                                      | 3.70e-232 |
| GE004076 | K03615 | Na <sup>+</sup> -translocating ferredoxin:NAD <sup>+</sup> oxidoreductase<br>subunit C | 1.10e-254 |
| GE004077 | K03614 | Na <sup>+</sup> -translocating ferredoxin:NAD <sup>+</sup> oxidoreductase<br>subunit D | 2.00e-172 |
| GE004215 | K03381 | catechol 1,2-dioxygenase                                                               | 8.90e-181 |
| GE004453 | K12979 | beta-hydroxylase                                                                       | 2.00e-175 |
| GE005094 | K00500 | phenylalanine-4-hydroxylase                                                            | 3.50e-154 |
| GE005202 | K12979 | beta-hydroxylase                                                                       | 1.50e-180 |
| GE005451 | K03617 | Na <sup>+</sup> -translocating ferredoxin:NAD <sup>+</sup> oxidoreductase<br>subunit A | 1.10e-95  |
| GE005452 | K03614 | Na <sup>+</sup> -translocating ferredoxin:NAD <sup>+</sup> oxidoreductase<br>subunit D | 1.40e-181 |
| GE005453 | K03612 | Na <sup>+</sup> -translocating ferredoxin:NAD <sup>+</sup> oxidoreductase<br>subunit G | 2.50e-104 |
| GE005454 | K03613 | Na <sup>+</sup> -translocating ferredoxin:NAD <sup>+</sup> oxidoreductase<br>subunit E | 1.80e-77  |
| GE005464 | K02192 | bacterioferritin-associated ferredoxin                                                 | 1.90e-33  |
| GE005589 | K01676 | fumarate hydratase, class I                                                            | 1.60e-291 |
| GE001749 | K00121 | S-(hydroxymethyl)glutathione dehydrogenase /<br>alcohol dehydrogenase                  | 6.3e-218  |
| GE001942 | K01607 | 4-carboxymuconolactone decarboxylase                                                   | 1.4e-65   |
| GE002182 | K00121 | S-(hydroxymethyl)glutathione dehydrogenase /<br>alcohol dehydrogenase                  | 5.8e-211  |
| GE002684 | K01053 | gluconolactonase                                                                       | 6.7e-181  |
| GE003109 | K13877 | 2,5-dioxopentanoate dehydrogenase                                                      | 1.2e-294  |
| GE003381 | K10617 | p-cumic alcohol dehydrogenase                                                          | 1.2e-132  |
| GE003382 | K10618 | p-cumic aldehyde dehydrogenase                                                         | 2.5e-286  |
| GE003383 | K10616 | p-cymene methyl-monooxygenase                                                          | 6.0e-224  |
| GE003384 | K18293 | p-cymene methyl-monooxygenase electron transfer<br>component                           | 5.4e-203  |
| GE003387 | K18227 | p-cumate 2,3-dioxygenase ferredoxin reductase<br>component                             | 6.9e-226  |
| GE003388 | K10619 | p-cumate 2,3-dioxygenase subunit alpha                                                 | 3.6e-265  |
| GE003389 | K16303 | p-cumate 2,3-dioxygenase subunit beta                                                  | 3.7e-94   |
| GE003390 | K10621 | 2,3-dihydroxy-p-cumate/2,3-dihydroxybenzoate<br>3,4-dioxygenase                        | 2.1e-185  |
| GE003391 | K10620 | 2,3-dihydroxy-2,3-dihydro-p-cumate dehydrogenase                                       | 1.8e-142  |
| GE003392 | K16304 | p-cumate 2,3-dioxygenase ferredoxin component                                          | 6.2e-66   |
| GE003393 | K10622 | HCOMODA/2-hydroxy-3-carboxy-muconic<br>semialdehyde decarboxylase                      | 1.9e-138  |
| GE003395 | K10623 | HOMODA hydrolase                                                                       | 6.1e-168  |

|                      |        |                                                                                |          |
|----------------------|--------|--------------------------------------------------------------------------------|----------|
| GE003396             | K02554 | 2-keto-4-pentenoate hydratase                                                  | 2.0e-141 |
| GE003397             | K04073 | acetaldehyde dehydrogenase                                                     | 5.3e-173 |
| GE003398             | K01666 | 4-hydroxy 2-oxovalerate aldolase                                               | 3.4e-197 |
| GE003404             | K10702 | 2-hydroxy-6-oxohepta-2,4-dienoate hydrolase                                    | 2.6e-160 |
| GE003405             | K03268 | benzene/toluene/chlorobenzene dioxygenase subunit<br>alpha                     | 7.3e-277 |
| GE003406             | K16268 | benzene/toluene/chlorobenzene dioxygenase subunit<br>beta                      | 2.5e-101 |
| GE003407             | K18089 | benzene/toluene/chlorobenzene dioxygenase<br>ferredoxin component              | 2.4e-61  |
| GE003408             | K18090 | benzene/toluene/chlorobenzene dioxygenase<br>ferredoxin reductase component    | 1.0e-224 |
| GE003409             | K16269 | cis-1,2-dihydrobenzene-1,2-diol/chlorobenzene<br>dihydrodiol dehydrogenase     | 4.5e-152 |
| GE003410             | K16270 | 3-methylcatechol 2,3-dioxygenase                                               | 1.5e-169 |
| GE003411             | K02554 | 2-keto-4-pentenoate hydratase                                                  | 1.8e-142 |
| GE003412             | K04073 | acetaldehyde dehydrogenase                                                     | 9.1e-173 |
| GE003413             | K01666 | 4-hydroxy 2-oxovalerate aldolase                                               | 4.1e-198 |
| GE003796             | K05783 | dihydroxycyclohexadiene carboxylate dehydrogenase                              | 2.5e-141 |
| GE003797             | K05784 | benzoate/toluate 1,2-dioxygenase reductase<br>component                        | 3.5e-191 |
| GE004132             | K13877 | 2,5-dioxopentanoate dehydrogenase                                              | 7.3e-260 |
| GE004160             | K01821 | 4-oxalocrotonate tautomerase                                                   | 4.8e-31  |
| GE004181             | K01607 | 4-carboxymuconolactone decarboxylase                                           | 2.1e-67  |
| GE004216             | K03464 | muconolactone D-isomerase                                                      | 2.9e-50  |
| GE004217             | K01856 | muconate cycloisomerase                                                        | 2.4e-204 |
| GE004358             | K00121 | S-(hydroxymethyl)glutathione dehydrogenase /<br>alcohol dehydrogenase          | 7.0e-217 |
| GE004480             | K13953 | alcohol dehydrogenase, propanol-preferring                                     | 4.8e-188 |
| GE005231             | K01826 | 5-carboxymethyl-2-hydroxymuconate isomerase                                    | 1.2e-61  |
| GE005244             | K13877 | 2,5-dioxopentanoate dehydrogenase                                              | 2.9e-285 |
| GE005565             | K01607 | 4-carboxymuconolactone decarboxylase                                           | 3.5e-70  |
| GE005566             | K01055 | 3-oxoadipate enol-lactonase                                                    | 2.4e-150 |
| GE005567             | K01857 | 3-carboxy-cis,cis-muconate cycloisomerase                                      | 8.5e-249 |
| <b>Citrate cycle</b> |        |                                                                                |          |
| GE000904             | K01960 | pyruvate carboxylase subunit B                                                 | 0.0e+00  |
| GE000905             | K01959 | pyruvate carboxylase subunit A                                                 | 1.1e-270 |
| GE000926             | K00382 | dihydrolipoamide dehydrogenase                                                 | 2.1e-266 |
| GE001129             | K18118 | succinyl-CoA:acetate CoA-transferase                                           | 3.8e-282 |
| GE001245             | K01610 | phosphoenolpyruvate carboxykinase (ATP)<br>pyruvate dehydrogenase E2 component | 3.3e-305 |
| GE001333             | K00627 | (dihydrolipoamide acetyltransferase)                                           | 7.0e-205 |
| GE001334             | K00163 | pyruvate dehydrogenase E1 component                                            | 0.0e+00  |
| GE001550             | K00627 | pyruvate dehydrogenase E2 component                                            | 4.4e-203 |

|          |        |                                                        |          |
|----------|--------|--------------------------------------------------------|----------|
|          |        | (dihydrolipoamide acetyltransferase)                   |          |
| GE001551 | K00162 | pyruvate dehydrogenase E1 component beta subunit       | 5.5e-192 |
| GE001552 | K00161 | pyruvate dehydrogenase E1 component alpha subunit      | 3.8e-182 |
| GE001649 | K00024 | malate dehydrogenase                                   | 1.9e-167 |
| GE001790 | K00116 | malate dehydrogenase (quinone)                         | 3.0e-287 |
| GE001959 | K01679 | fumarate hydratase, class II                           | 5.6e-248 |
| GE002318 | K01679 | fumarate hydratase, class II                           | 8.1e-263 |
| GE002617 | K01681 | aconitate hydratase                                    | 0.0e+00  |
| GE002624 | K00116 | malate dehydrogenase (quinone)                         | 1.7e-304 |
| GE002813 | K01682 | aconitate hydratase 2 / 2-methylisocitrate dehydratase | 0.0e+00  |
| GE004024 | K00116 | malate dehydrogenase (quinone)                         | 1.6e-307 |
| GE004666 | K00031 | isocitrate dehydrogenase                               | 2.2e-243 |
| GE004667 | K00031 | isocitrate dehydrogenase                               | 0.0e+00  |
| GE004831 | K01902 | succinyl-CoA synthetase alpha subunit                  | 5.0e-165 |
| GE004832 | K01903 | succinyl-CoA synthetase beta subunit                   | 8.1e-216 |
| GE004833 | K00382 | dihydrolipoamide dehydrogenase                         | 1.1e-265 |
|          |        | 2-oxoglutarate dehydrogenase E2 component              |          |
| GE004834 | K00658 | (dihydrolipoamide succinyltransferase)                 | 5.4e-170 |
| GE004835 | K00164 | 2-oxoglutarate dehydrogenase E1 component              | 0.0e+00  |
|          |        | succinate dehydrogenase / fumarate reductase,          |          |
| GE004836 | K00240 | iron-sulfur subunit                                    | 1.7e-136 |
|          |        | succinate dehydrogenase / fumarate reductase,          |          |
| GE004837 | K00239 | flavoprotein subunit                                   | 0.0e+00  |
|          |        | succinate dehydrogenase / fumarate reductase,          |          |
| GE004838 | K00242 | membrane anchor subunit                                | 1.7e-63  |
|          |        | succinate dehydrogenase / fumarate reductase,          |          |
| GE004839 | K00241 | cytochrome b subunit                                   | 2.2e-61  |
| GE004840 | K01647 | citrate synthase                                       | 2.5e-250 |
| GE005066 | K00382 | dihydrolipoamide dehydrogenase                         | 4.9e-260 |
| GE005250 | K00116 | malate dehydrogenase (quinone)                         | 0.0e+00  |

E-value: The expected value of the function annotation result, the smaller the more credible;

Table S5. Comparison of BPA degradation rates by various microorganisms

| Microorganism                             | BPA concentration<br>(mg/L) | Degradation<br>Efficiency(%) | Time(h) | Reference |
|-------------------------------------------|-----------------------------|------------------------------|---------|-----------|
| <i>Lactobacillus reuteri</i>              | 1                           | 69.83                        | 48      | [1]       |
| <i>Streptomyces sp.</i>                   | 1                           | 91                           | 240     | [2]       |
| <i>Sphingobium sp.</i> BID32              | 1                           | 100                          | 4.2     | [3]       |
| <i>Streptomyces sp</i>                    | 1                           | 90                           | 96      | [2]       |
| <i>Ralstonia eutropha</i>                 | 1-20                        | 15-56                        | 240     | [4]       |
| <i>Achromobacter xylosoxidans</i><br>B-16 | 3                           | 100                          | 108     | [5]       |
| <i>Bacillus sp.</i> GZB                   | 5                           | 92.9                         | 96      | [6]       |

|                                   |       |             |          |            |
|-----------------------------------|-------|-------------|----------|------------|
| <i>Ochrobactrum</i> sp.           | 10    | 52.1        | 70 days  | [7]        |
| <i>P. chrysosporium</i>           | 20    | 59          | 96       | [8]        |
| <i>Pseudomonas</i> sp. P1         | 15-30 | 71.79-96.89 | 120      | This study |
| <i>Cupriavidus basilensis</i> JF1 | 34.2  | 50          | 144 days | [9]        |
| <i>Sphingobium</i> sp. YC-JY1     | 100   | 100         | 12       |            |

Table S6. Information about functional genes resistant to BPA toxicity

| Gene_ID                 | KO     | KO_function                                      | E-value  |
|-------------------------|--------|--------------------------------------------------|----------|
| <b>Bacterial</b>        |        |                                                  |          |
| <b>secretion system</b> |        |                                                  |          |
| GE000007                | K03070 | preprotein translocase subunit SecA              | 0.0e+00  |
| GE000417                | K11903 | type VI secretion system secreted protein Hcp    | 1.1e-84  |
| GE000453                | K12340 | outer membrane protein                           | 7.1e-262 |
| GE000545                | K03116 | sec-independent protein translocase protein TatA | 6.6e-36  |
| GE000546                | K03117 | sec-independent protein translocase protein TatB | 4.1e-52  |
| GE000547                | K03118 | sec-independent protein translocase protein TatC | 1.1e-139 |
| GE000585                | K03071 | preprotein translocase subunit SecB              | 8.1e-85  |
| GE000645                | K03110 | fused signal recognition particle receptor       | 2.5e-188 |
| GE000732                | K02454 | general secretion pathway protein E              | 0.0e+00  |
| GE000972                | K03217 | YidC/Oxa1 family membrane protein insertase      | 0.0e+00  |
| GE001435                | K03073 | preprotein translocase subunit SecE              | 3.1e-52  |
| GE001468                | K03076 | preprotein translocase subunit SecY              | 5.8e-242 |
| GE001885                | K03210 | preprotein translocase subunit YajC              | 1.7e-54  |
| GE001886                | K03072 | preprotein translocase subunit SecD              | 0.0e+00  |
| GE001887                | K03074 | preprotein translocase subunit SecF              | 6.4e-160 |
| GE002053                | K03118 | sec-independent protein translocase protein TatC | 7.8e-135 |
| GE002054                | K03117 | sec-independent protein translocase protein TatB | 6.1e-46  |
| GE002055                | K03116 | sec-independent protein translocase protein TatA | 6.3e-35  |
| GE002056                | K02460 | general secretion pathway protein K              | 1.5e-178 |
| GE002060                | K02452 | general secretion pathway protein C              | 5.6e-74  |
| GE002061                | K02453 | general secretion pathway protein D              | 0.0e+00  |
| GE002062                | K02454 | general secretion pathway protein E              | 1.1e-267 |
| GE002063                | K02455 | general secretion pathway protein F              | 2.6e-209 |
| GE002064                | K02456 | general secretion pathway protein G              | 9.5e-77  |
| GE002065                | K02457 | general secretion pathway protein H              | 2.0e-79  |
| GE002066                | K02458 | general secretion pathway protein I              | 1.6e-61  |
| GE002067                | K02459 | general secretion pathway protein J              | 4.2e-124 |
| GE002068                | K02461 | general secretion pathway protein L              | 1.7e-212 |
| GE002071                | K11016 | hemolysin                                        | 0.0e+00  |
| GE002072                | K11016 | hemolysin                                        | 0.0e+00  |
| GE002073                | K11017 | hemolysin activation/secretion protein           | 0.0e+00  |
| GE002084                | K03106 | signal recognition particle subunit SRP54        | 4.0e-222 |
| GE002361                | K12340 | outer membrane protein                           | 1.1e-238 |

|                        |        |                                                |          |
|------------------------|--------|------------------------------------------------|----------|
| GE003138               | K11892 | type VI secretion system protein ImpK          | 2.3e-170 |
| GE003139               | K11904 | type VI secretion system secreted protein VgrG | 0.0e+00  |
| GE003865               | K11904 | type VI secretion system secreted protein VgrG | 0.0e+00  |
| GE003881               | K11907 | type VI secretion system protein VasG          | 0.0e+00  |
| GE003882               | K11906 | type VI secretion system protein VasD          | 4.2e-114 |
| GE003884               | K11892 | type VI secretion system protein ImpK          | 3.5e-129 |
| GE003885               | K11891 | type VI secretion system protein ImpL          | 0.0e+00  |
| GE003887               | K11891 | type VI secretion system protein ImpL          | 0.0e+00  |
| GE003888               | K11903 | type VI secretion system secreted protein Hcp  | 3.3e-92  |
| GE003933               | K02456 | general secretion pathway protein G            | 6.6e-75  |
| GE003934               | K02455 | general secretion pathway protein F            | 5.6e-212 |
| GE003983               | K02456 | general secretion pathway protein G            | 5.1e-63  |
| GE003984               | K02456 | general secretion pathway protein G            | 3.6e-85  |
| GE003985               | K02453 | general secretion pathway protein D            | 0.0e+00  |
| GE003990               | K02454 | general secretion pathway protein E            | 0.0e+00  |
| GE004239               | K11906 | type VI secretion system protein VasD          | 1.3e-48  |
| GE004240               | K11891 | type VI secretion system protein ImpL          | 1.1e-130 |
| GE004701               | K11904 | type VI secretion system secreted protein VgrG | 0.0e+00  |
| <b>Mismatch repair</b> |        |                                                |          |
| GE000294               | K02342 | DNA polymerase III subunit epsilon             | 4.5e-109 |
| GE000325               | K02340 | DNA polymerase III subunit delta               | 1.2e-191 |
| GE000426               | K03572 | DNA mismatch repair protein MutL               | 0.0e+00  |
| GE000497               | K01972 | DNA ligase (NAD <sup>+</sup> )                 | 0.0e+00  |
|                        |        | DNA helicase II / ATP-dependent DNA helicase   |          |
| GE000911               | K03657 | PcrA                                           | 0.0e+00  |
| GE000976               | K02338 | DNA polymerase III subunit beta                | 2.0e-200 |
| GE001349               | K02342 | DNA polymerase III subunit epsilon             | 4.9e-131 |
| GE001479               | K03111 | single-strand DNA-binding protein              | 1.3e-70  |
| GE001523               | K03602 | exodeoxyribonuclease VII small subunit         | 4.2e-34  |
| GE001992               | K02339 | DNA polymerase III subunit chi                 | 2.5e-77  |
| GE002039               | K03601 | exodeoxyribonuclease VII large subunit         | 8.3e-199 |
| GE002099               | K07462 | single-stranded-DNA-specific exonuclease       | 0.0e+00  |
| GE002173               | K02337 | DNA polymerase III subunit alpha               | 0.0e+00  |
| GE002191               | K03555 | DNA mismatch repair protein MutS               | 0.0e+00  |
| GE002483               | K02341 | DNA polymerase III subunit delta'              | 5.5e-181 |
| GE004784               | K02342 | DNA polymerase III subunit epsilon             | 1.4e-139 |
| GE004906               | K02343 | DNA polymerase III subunit gamma/tau           | 0.0e+00  |
| GE004916               | K01972 | DNA ligase (NAD <sup>+</sup> )                 | 0.0e+00  |
| GE005442               | K10747 | DNA ligase 1                                   | 0.0e+00  |
| GE005584               | K01141 | exodeoxyribonuclease I                         | 3.2e-286 |

E-value: The expected value of the functional annotation results, the smaller the more plausible.



Table S7 LC-MS data of BPA degradation intermediates

| Products                                 | MW     | M (m/z) | Molecular Formula                              |
|------------------------------------------|--------|---------|------------------------------------------------|
| 1,2-Bis(4-hydroxyphenyl)-2-propanol      | 244.49 | 243.2   | C <sub>15</sub> H <sub>16</sub> O <sub>3</sub> |
| 4,4'-Dihydroxy- $\alpha$ -methylstilbene | 226.27 | 225     | C <sub>15</sub> H <sub>14</sub> O <sub>2</sub> |
| 4-Vinylphenol                            | 120.15 | 119.1   | C <sub>8</sub> H <sub>8</sub> O                |
| 4-hydroxybenzoate                        | 138.13 | 137.1   | C <sub>7</sub> H <sub>6</sub> O <sub>3</sub>   |
| phenol                                   | 94.11  | 93      | C <sub>6</sub> H <sub>6</sub> O                |
| 4-isopropenyl phenol                     | 134.18 | 133.1   | C <sub>9</sub> H <sub>10</sub> O               |

## 2. Supplementary Figures

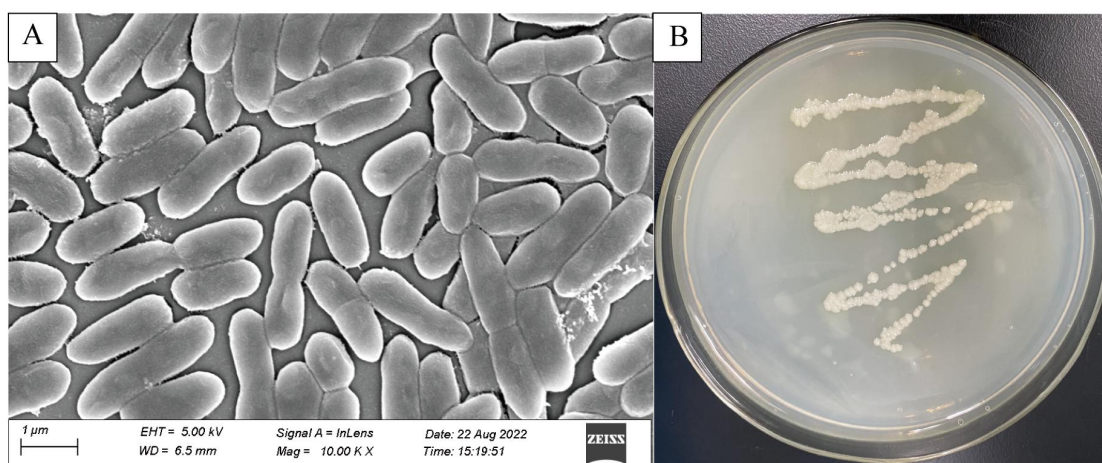

Figure S1. Scanning electron microscope (A) and morphological observation (B) of strain P1

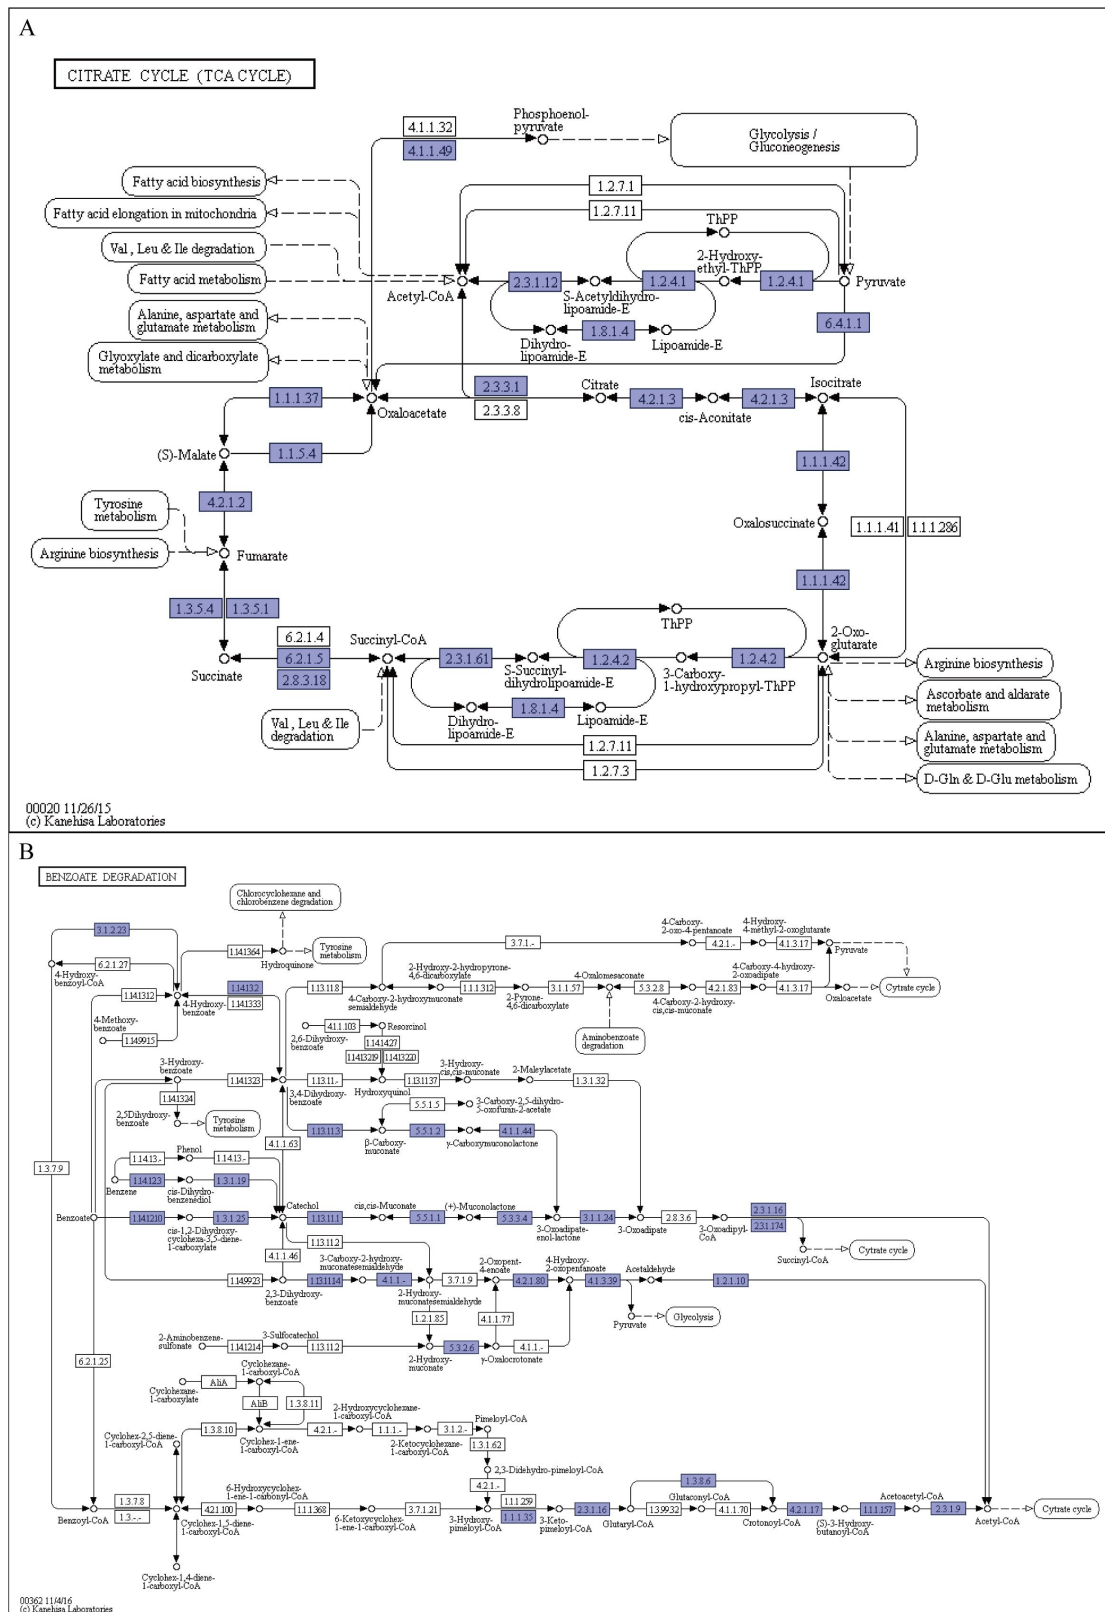

Figure S2. The complete TCA cycle (A) and Benzoate degradation (B) were present in the genome of strain P1. The data are based on RAST analysis. Enzyme committee numbers were obtained from the KEGG database.

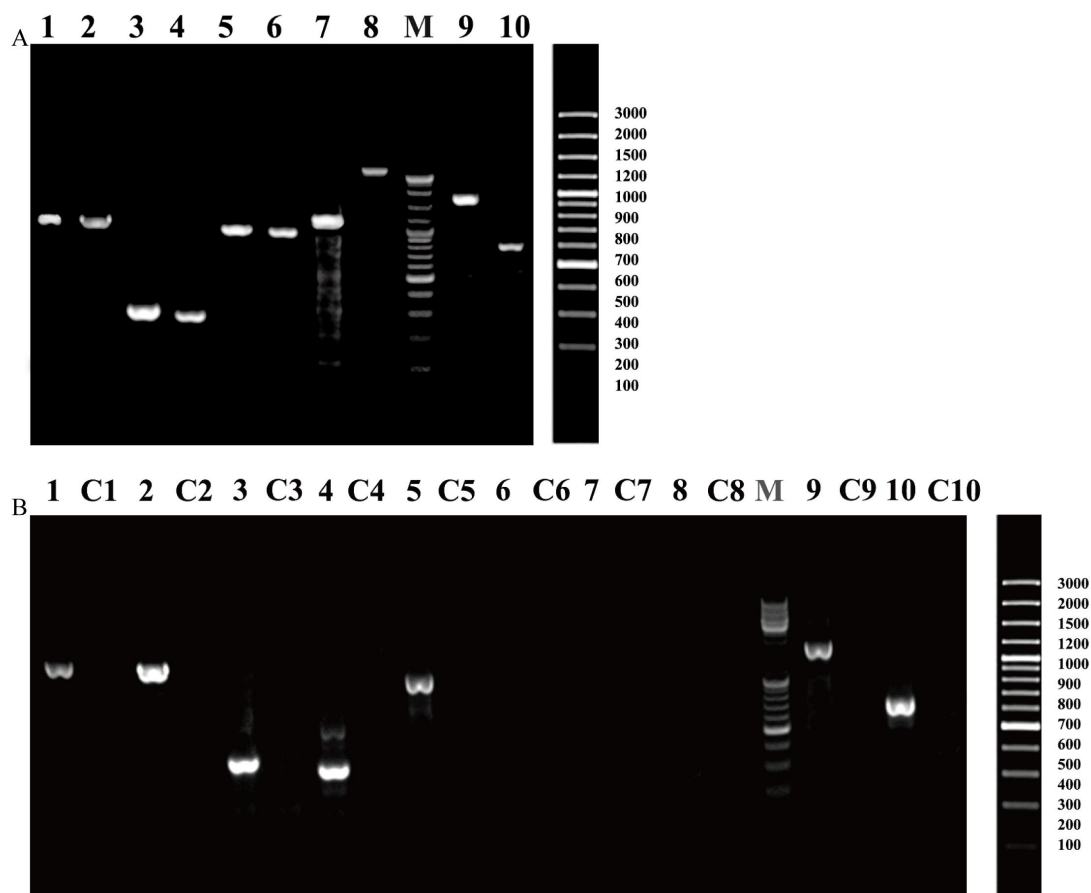

Figure S3. (A) PCR results of BPA degradation-related genes. (B) RT-PCR agarose gel electrophoresis of BPA degradation-related genes under different conditions. The bands of each lane are shown below: M: DNA Marker DL3000; 1. Cytochrome P450; 2. Cytochrome P450; 3. Ferredoxin; 4. Ferredoxin; 5. Aldo/keto reductase; 6. Hydrolase; 7. 2-octaprenyl-6-methoxyphenol hydroxylase; 8. Copper oxidase; 9. Copper oxidase; 10. Laccase.

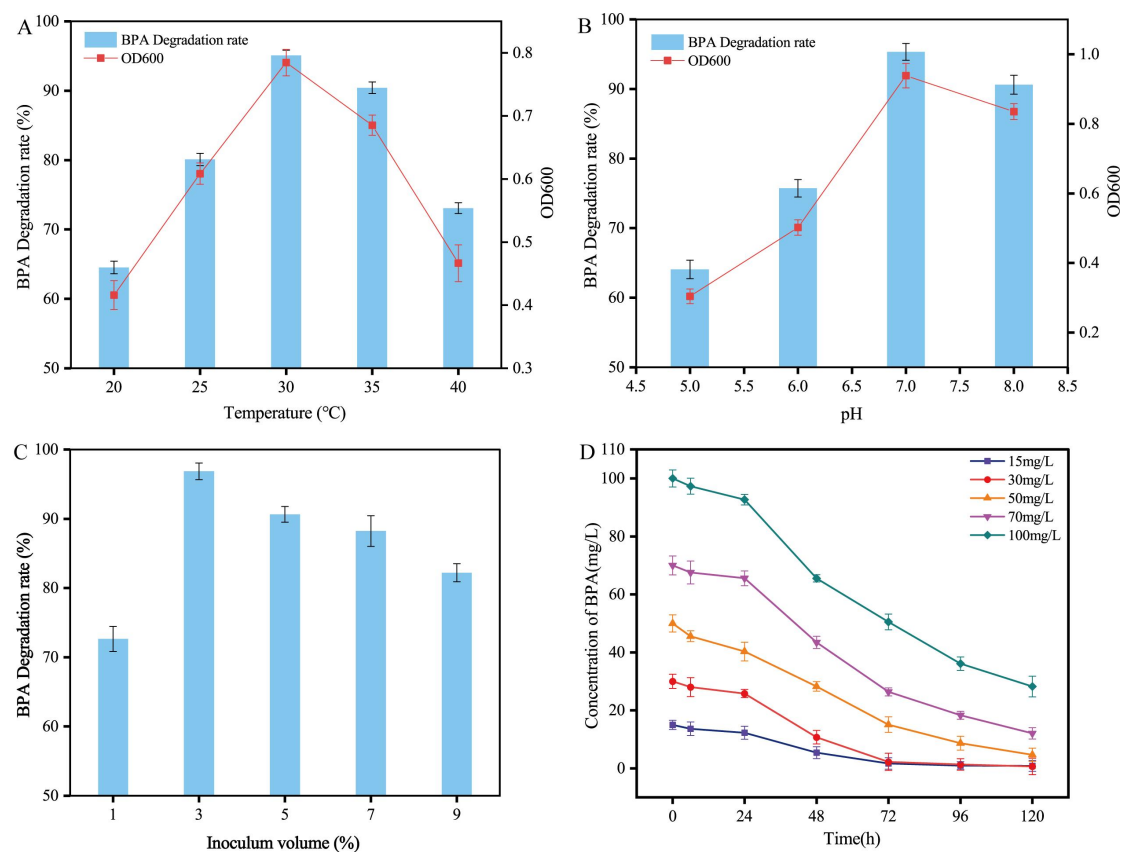

Figure S4. Degradation of BPA by strain P1 (A) different temperature, (B) different pH, (C) different inoculum size, (D) different initial concentration

- Ju, J.; Shen, L.; Xie, Y.F.; Yu, H.; Guo, Y.H.; Cheng, Y.L.; Qian, H.; Yao, W. Degradation potential of bisphenol A by *Lactobacillus reuteri*. *Lwt-Food. Sci. Technol.* 2019, 106, 7-14, <https://doi.org/10.1016/j.lwt.2019.02.022>.
- Kang, J.H.; Ri, N.; Kondo, F. *Streptomyces* sp. strain isolated from river water has high bisphenol A degradability. *Lett. Appl. Microbiol.* 2004, 39, 178-180, <https://doi.org/10.1111/j.1472-765X.2004.01562.x>.
- Zhou, N.A.; Lutovsky, A.C.; Andaker, G.L.; Gough, H.L.; Ferguson, J.F. Cultivation and characterization of bacterial isolates capable of degrading pharmaceutical and personal care products for improved removal in activated sludge wastewater treatment. *Biodegradation.* 2013, 24, 813-827, <https://doi.org/10.1007/s10532-013-9630-9>.
- Heidari, H.; Sedighi, M.; Zamir, S.M.; Shojaosadati, S.A. Bisphenol A degradation by *Ralstonia eutropha* in the absence and presence of phenol. *Int. Bio. Biodegr.* 2017, 119, 37-42, <https://doi.org/10.1016/j.ibiod.2016.10.052>.

5. Zhang, C.; Zeng, G.; Yuan, L.; Yu, J.; Li, J.; Huang, G.; Xi, B.; Liu, H. Aerobic degradation of bisphenol A by *Achromobacter xylosoxidans* strain B-16 isolated from compost leachate of municipal solid waste. *Chemosphere*. 2007, 68, 181-190, <https://doi.org/10.1016/j.chemosphere.2006.12.012>.
6. Li, G.; Zu, L.; Wong, P.-K.; Hui, X.; Lu, Y.; Xiong, J.; An, T. Biodegradation and detoxification of bisphenol A with one newly-isolated strain *Bacillus* sp GZB: Kinetics, mechanism and estrogenic transition. *Bioresource. Technol.* 2012, 114, 224-230, <https://doi.org/10.1016/j.biortech.2012.03.067>.
7. Li, G.; Xiong, J.; Wong, P.K.; An, T. Enhancing tetrabromobisphenol A biodegradation in river sediment microcosms and understanding the corresponding microbial community. *Environ. Pollut.* 2016, 208, 796-802, <https://doi.org/10.1016/j.envpol.2015.11.001>.
8. Wang, J.; Xie, Y.; Hou, J.; Zhou, X.; Chen, J.; Yao, C.; Zhang, Y.; Li, Y. Biodegradation of bisphenol A by alginate immobilized *Phanerochaete chrysosporium* beads: Continuous cyclic treatment and degradation pathway analysis. *Biochem. Eng. J.* 2022, 177, <https://doi.org/10.1016/j.bej.2021.108212>.
9. Jia, Y.; Eltoukhy, A.; Wang, J.; Li, X.; Hlaing, T.S.; Aung, M.M.; Nwe, M.T.; Lamraoui, I.; Yan, Y. Biodegradation of Bisphenol A by *Sphingobium* sp. YC-JY1 and the Essential Role of Cytochrome P450 Monooxygenase. *Int. J. Mol. Sci.* 2020, 21, <https://doi.org/10.3390/ijms21103588>.
